# Supplementary material for: The effectiveness of computerized clinical guidelines in the process of care: a systematic review
Source: BMC Health Serv Res. 2010 Jan 4;10:2. doi: 10.1186/1472-6963-10-2 (PMC2837004; doi:10.1186/1472-6963-10-2)
Supplement: Additional file 2 — Appendix 2. List of outcomes of selected articles. [file 1472-6963-10-2-S2.XLS]

## Sheet: Data
Appendix 2
ID	Author	Year	Journal	Outcome	Intervention group	Control group	Difference	OR/HR	IC	p	Results
1	Burack	1997	Medical Care	Mammography rates Health Department (HD)	0.44	0.28		1899-12-31 00:01:00	1.40-2.40		S
				Mammography rates Health Maintenance Organisation (HMO)	0.45	0.46		1899-12-31 01:06:00	0.80-1.42		NS
2	Burack	1994	Medical Care	Effect of reminder over 6 months upon mammography appointements-HD-1	0.65	0.37	28.7		20.7-36.7		S
				" HD-2	0.4	0.11	29.3		21.1-37.5		S
				" HMO	0.41	0.28	13		5.9-20		S
				" HOSPITAL (HOSP) -1	0.38	0.23	15.3		5.2-25.4		S
				" HOSP-2	0.46	0.24	22.7		14.8-30.6		S
				Effect of reminder over 6 months on completion of first appointments- Postcard effect- HD-1	0.77	0.84	-6.6		-16.1;2.9		NS
				"-HD-2	0.83	0.53	25.5		2.7-48.4		S
				" HMO	0.82	0.8	1.3		-8.9;11.5		NS
				" HOSP-1	0.81	0.74	7.1		-10.5;24.6		NS
				" HOSP-2	0.67	0.74	-6.3		-20.1;7.4		NS
				Effect of reminder over 6 months on completion of first appointments- Follow-up effect- HD-1	0.32	0.13	19.2		-2.4;40.8		NS
				"-HD-2	0.38	0.22	16.2		-21.7;54.1		NS
				" HMO	0.37	0.16	21.2		-3.3; 45.8		NS
				" HOSP-1	0.36	0.22	14.1		-25.2;53.5		NS
				" HOSP-2	0.37	0.69	-32.2		-59.2; -5.1		S
				Effect of reminder over 12 months on overall use of mammography-HD-1	0.64	0.44	19.5		11.6-27.5		S
				"-HD-2	0.5	0.25	25.2		16.3-34.2		S
				" HMO	0.59	0.46	12.1		5.2-19.1		S
				" HOSP-1	0.43	0.28	14.2		4.0-24.4		S
				" HOSP-2	0.45	0.28	16.5		9.0-24.0		S
3	Butzlaff	2003	Family Practice	Increase of knowledge (median of correctly answered questions)	13(11-15.25)	15(12-17)				0.1	NS
4	Cannon	2000	JAMIA	Occurance of screening for mood disorders	86.5%	61.0%				0.008	S
				Proportion of case with full documented diagnosis of Major Depressive Disorders	0.44	0.17				<0.001	S
5	Carton	2002	Clinical Radiology	Proportion of request that did not conform to the guidelines	26.9%	33.2%				0.0001	S
6	Dayton	2000	Medical Decision Making	Compliance with guidelines	95.8%	56.6%				0.001	S
7	Demakis	2000	JAMIA	general adherence rate (%)
				All standards	58.8	53.5		1899-12-31 01:24:00	1.08-1.42	0.002	S
				Coronary artery disease	79.0	78.3		1899-12-31 01:05:00	0.82-1.34	0.72	NS
				Hypertension	55.2	49.3		1899-12-31 01:27:00	0.92-1.75	0.14	NS
				Diabetes: glycosylated hemoglobin level	70.6	65.9		1899-12-31 01:24:00	0.89-1.73	0.19	NS
				Diabetes:nutrition counseling	61.6	53.3		1899-12-31 01:29:00	0.93-1.79	0.12	NS
				Diabetes: urinalysis	69.8	62.6		1899-12-31 01:38:00	1.13-1.68	0.001	S
				Diabetes:eye examination	73.5	63.4		1.60	1.29-2.00	<0.001	S
				Diabetes or peripheral vascular diseas: foot examination	48.6	42.8		1.26	1.02-1.56	0.03	S
				Smokers;cessation counseling	63.5	54.8		1.44	1.01-2.05	0.04	S
				Age>=65 y or high risk: pneumococcal vaccination	12.7	4.3		3.26	2.09-5.09	<0.001	S
				Warfarin treatment monitoring	67.3	64.5		1899-12-31 01:13:00	0.68-1.88	0.63	NS
				Atrial fibrillation	75	81.7		0.67	0.41-1.09	0.1	NS
				Myocardial infarction	44.7	41.3		1.15	0.81-1.62	0.42	NS
				Gastrointestinal bleeding/NSAID teraphy:switch drugs	65.5	67.9		0.90	0.65-1.23	0.49	NS
				Visit-Specific adherence rate (%)
				All standards	17.9	12.2		1899-12-31 01:57:00	1.45-1.71	<0.001	S
				Coronary artery disease	30.4	24.4		1899-12-31 01:35:00	1.07-1.71	0.01	S
				Hypertension	17.0	10.3		1.77	1.53-2.05	<0.001	S
				Diabetes: glycosylated hemoglobin level	26.5	20.1		1.43	1.17-1.77	0.001	S
				Diabetes:nutrition counseling	17.0	13.7		1899-12-31 01:29:00	1.05-1.58	0.02	S
				Diabetes: urinalysis	20.3	16.0		1899-12-31 01:34:00	1.06-1.68	0.01	S
				Diabetes:eye examination	17.7	9.0		1899-12-31 02:19:00	1.63-2.94	<0.001	S
				Diabetes or peripheral vascular diseas: foot examination	13.1	5.5		1899-12-31 02:57:00	2.02-3.26	<0.001	S
				Smokers;cessation counseling	12.5	8.2		1.61	1.02-2.53	0.04	S
				Age>=65 y or high risk: pneumococcal vaccination	7.9	1.1		7.85	3.83-16.08	<0.001	S
				Warfarin treatment monitoring	32.4	42.6		0.64	0.36-1.15	0.13	NS
				Atrial fibrillation	54.8	53.0		1.08	0.51-2.28	0.85	NS
				Myocardial infarction	18	18		1.00	0.54-1.85	>0.99	NS
				Gastrointestinal bleeding/NSAID teraphy:switch drugs	24.8	31.0		0.74	0.40-1.34	0.31	NS
8	Derose	2005	American Journal Manag Care	Prescription dispensation rates after the first patient-physician encounter- ACEI o ARB	7.1 (6.1-8.2)	5.7 (4.8-6.7)	1.4			0.48	NS
				Statin	8.1 (7.6-10.2)	7.7 (6.6-8.9)	0.4			0.61	NS
				ACEI o ARB and statin	7.6 (6.8-8.4)	6.6 (5.9-7.4)	1			0.08	S
9	Dexter	2001	New England Journal of Medicine	Percentage of hospitalizations during which therapy was ordered for an eligible patient)
				Pneumococcal vaccination	35.8%	0.8%				<0.001	S
				Influenza vaccination	51.4%	1.0%				<0.001	S
				Subcutaneous heparin	32.2%	18.9%				<0.001	S
				Aspirin at discharge	36.4%	27.6%				<0.001	S
10	Durieux	2000	Journal of the American Medical Association	Proportion of appropriate prescriptions	94.9%	82.8%			Int 92.5-96.6; Contr 77.6-87.1		S
11	Feldman	2005	Health Services Research	Self-Management Indicators- medicine management-patient recognition of Hearth Failure medications (synthesis of 5 different outcomes)						0.002 BI; 0.023 AI	S
				Diet-patients salt food	27.6 Basic Interventions (BI); 23.3 Augmented Interventios (AI)	30.7				0.49 BI; 0.095 AI	S/NS
				Weight Management						0.352 BI; 0.095 AI	NS
				Kansas City Cardiomyopathy Questionnaire summary scores	46.6 BI; 45.6 AI	40.4				0.013 BI; 0.048 AI	S
				Kansas City Cardiomyopathy Questionnaire self-efficacy domain score	86.8 BI; 86.3 AI	85.8				0.756 BI; 0.880 AI	NS
				Depression (with Geriatric depression Scale)	37.4 BI; 36.9 AI	36.3				0.802 BI; 0.888 AI	NS
				EuroQoL EQ-5D	48.9 BI; 40.2 AI	39.3				0.003 BI; 0.777 AI	S/NS
				Service use measures- number of home care-related visits	43.6 BI; 44.1 AI	35.2				0.048 BI; 0.053 AI	S
				Any hospitalization	30.3% BI ; 24.3% AI	25.0%				0.209 BI; 0.839 AI	NS
				Number of inpatient nights	1.97 BI; 2.33 AI	1.80				0.729 BI; 0.383 AI	NS
				Number of emergency department visits	0.44 BI; 0.53 AI	0.40				0.573 BI; 0.120 AI	NS
				Number of outpatient doctors' visits	2.98 BI 2.62AI	2.85				0.771 BI; 0.546 AI	NS
12	Feldstein	2006	Journal American Geriatric Soc	Bone Mineral Density (BMD) measurement	*coefficients represent absolute changes in the probability of the outcame			0.39*	0.28-0.50		S
				Osteoporosis medication only				0.23*	0.12-0.33		S
				BMD measurement or osteoporosis medication				0.47*	0.35-0.59		S
				BMD measurement				0.39*	0.28-0.50		S
				Osteoporosis medication only				0.23*	0.12-0.33		S
				BMD measurement or osteoporosis medication				0.47*	0.35-0.59		S
				BMD measurement				0.31*	0.21-0.43		S
				Osteoporosis medication only				0.15*	0.05-0.26		S
				BMD measurement or osteoporosis medication				0.38*	0.26-0.50		S
				Changes in calcium intake						0.02(EMR reminder vs UC); 0.05(EMR reminder+patient reminder)	S
				Regular activity						0.17(EMR reminder vs UC); 0.55(EMR reminder+patient reminder)	NS
				Caloric exepediture per week						0.96(EMR reminder vs UC); 0.32(EMR reminder+patient reminder)	NS
				Satisfaction with care and services						0.81	NS
13	Filippi	2003	Diabetes Care	Number of treated patients with antiplatelet drugs				1.99	1.79-2.22		S
14	Fitzmaurice	2000	Archives of Internal Medicine	Proportion of time spent in the international normalized ratio range						<0.001	S
15	Frank	2004	Australian Family Physician	Effect of reminders on the uptake of preventive activities -tetanus immunisation	2.80%	1.50%	1.89		1.59-2.25		S
				Recording of allergies	0.09	0.05	1.81		1.63-2.02		S
				Pneumococcal immunisation	2.8%	1.6%	1.70		1.10-2.62		S
				Recording of weight	6.2%	4.9%	1.28		1.13-1.44		S
				Measles, mumps and rubella immunisation	10.3%	8.2%	1.25		0.82-1.93		NS
				Smoking status	2.0%	1.8%	1.12		0.90-1.39		NS
				Cervical smear	7.8%	7.2%	1.09		0.91-1.29		NS
				Blood pressure	15.5%	15.1%	1.02		0.90-1.16		NS
				Diabetes screening	2.4%	2.5%	0.98		0.65-1.48		NS
				Influenza immunisation	26.2%	27.2%	0.96		0.78-1.18		NS
				Lipid screening	2.4%	2.7%	0.89		0.73- 1.09		NS
16	Hetlevik	1999	Scandinavian Journal of Primary Health Care	SBPmmHg(SD)	156.8(19.4)	155.6(19.0)	1.2		-0.6;3.0		NS
				DBPmmHg(SD)	88.8(9.7)	89.8(8.9)	-1.0		-1.9;-0.2		S
				S-chol mmol/l(SD)	6.64(1.2)	6.57(1.3)	0.07		-0.1;0.2		NS
				Smokers %	21	19	2.0		-2.6;6.6		NS
				CV inheritance%	62	66	-4.0		-14.5;6.5		NS
				BMI Kg/m2(SD)	27.8(4.5)	27.7(4.8)	0.1		-0.4;0.7		NS
				Risk score female	17.9(17.9)	20.6(23.5)	-2.7		-6.3;1.0		NS
				Risk score male	67.9(83.9)	66.8(73.4)	1.1		-14.6;6.9		NS
17	Hetlevik	2000	International Journal of Technology Assessment in Health Care	HbAlc	20.5	18.8	1.7		-3.8;7.2		NS
				Blood pressure	18.7	18.5	0.2		-5.2;5.6		NS
				Serum cholesterol	56.3	62.7	-6.4		-13.2;0.4		NS
				Cigarettes	82.6	94.5	-11.9		-16.3;-7.5		S
				CV inheritance	78.7	83.4	-4.7		-10.2;0.8		NS
				BMI	78.2	93.0	-14.8		-19.5;-9.9		S
				Risk score	91.1	98.3	-7.2		-10.3;-4.1		S
18	Jousimaa	2002	International Journal of Technology Assessment in Health Care	Laboratory examinations	1,481 (90.3%)	1,372 (89.7%)		1899-12-31 01:07:00	0.79-1.44		NS
				Radiological examinations	1,504 (93.8%)	1,416 (93.3%)		1899-12-31 01:09:00	0.81-1.46		NS
				Physical examinations	1,494 (92.8%)	1,461 (94.6%)		0.74	0.51-1.06		NS
				Other examinations	235 (74.8%)	248 (80.8%)		0.71	0.43-1.17		NS
				Procedures	152 (77.6%)	140 (81.9%)		0.77	0.43-1.36		NS
				Physiotherapy	77 (78.6%)	83 (80.6%)		0.88	0.34-2.32		NS
				Nonpharmacologic Treatment	80 (87.0%)	110 (90.2%)		0.73	0.22-2.41		NS
				Pharmacological Treatment	1,391 (84.1%)	1,350 (86.1%)		0.85	0.67-1.09		NS
				Referrals	1,619 (96.1%)	1,508 (95.6%)		1.13	0.79-1.63		NS
19	Kitahata	2003	Clinical Infectious Disease	Adherence to HIV guidelines-receipt of prophylaxis against Mycobacterium Avium Complex				3.84	1.58-9.32	0.003	S
				Receipt of prophylaxis against PCP				1.16	0.84-1.59	>0.2	NS
				Performance of screening for toxoplasma gondii				1.86	1.05-3.27	0.03	S
				Performance of screening for syphilis				3.71	2.37-5.81	<0.0001	S
				Cervical carcinoma screening				2.09	1.04-4.16	0.04	S
				Tubercolin skin test						> 0.2	NS
20	Kucher	2005	The New England Journal of medicine	Rates of use of mechanical prophylaxis	0.1	1.5%				<0.001	S
				Rates of use of pharmacologic prophylaxis	23.6%	13.0%				<0.001	S
				Venous thromboembolism at 30 days	3.3%	5.7%		0.59	0.39-0.85	0.004	S
				Venous thromboembolism at 60 days	4.9%	8.2%		0.59	0.43-0.81	0.0001	S
				Pulmonary embolism at 30 days	0.8%	1.7%		0.48	0.22-1.01	0.05	S
				Pulmonary embolism at 60 days	1.1%	2.8%		0.40	0.21-0.74	0.004	S
				Proximal-leg deep-vein thrombosis at 30 days	0.6%	1.4%				0.08	S
				Proximal-leg deep-vein thrombosis at 60 days	0.8%	1.8%				0.08	S
				Distal-leg deep-vein thrombosis at 30 days	0.2%	0.6%				0.15	NS
				Distal-leg deep-vein thrombosis at 60 days	0.4%	1.0%				0.1	NS
				Deep-vein thrombosis of the arms at 30 days	1.6%	2.0%				0.46	NS
				Deep-vein thrombosis of the arms at 60 days	2.5%	2.6%				0.9	NS
				Absence of venous thromboembolism at 90 days-kaplan Meier	94.1%	90.6%				<0.001	S
				Reduction risk of venous thromboembolism at 90 days				0.59	0.43-0.81	0.001	S
				Death at 30 days	13.9%	12.5%		1.07	0.86-1.32	0.56	NS
				Death at 90 days	22.5%	22.3%		0.97	0.82-1.15	0.74	NS
				Major hemorrhage at 30 days	1.5%	1.5%		0.95	0.50-1.80	0.87	NS
				Minor hemorrhage at 30 days	6.5%	7.0%		0.88	0.65-1.20	0.43	NS
21	Lafata	2002	Journal of General Internal Medicine	retinal exams				1.23	1.07-1.41		S
				diabetes visits				1.25	1.09-1.29		S
				glycated haemoglobin test				1.21	1.03-1.43		S
22	Lobach	1997	The American Journal of Medicine	Compliance rate with guidelines						<0.01	S
				Compliance rate with recommendations						<0.01	S
				Meetings' average time					-5.9 - 8.8	>0.1	NS
23	Raebel	2005	Archives of Internal Medicine	Percentage of laboratory monitoring prescriptions	79.1%	70.2%			Int 78-80.2 Contr 68.9-71.5	<0.001	S
				Percentage of monitoring drugs
				Allopurinol	82.0(79.9-84.8)	69.9(66.4-73.3)				<0.001	S
				Amiodarone	78.6(73.1-83.5)	51.4(44.4-58.4)				<0.001	S
				Azathioprine	89.8(82.5-94.8)	83.9(75.8-90.2)				0.2	NS
				Carbamazepine	71.3(67.2-75.3)	56.4(51.6-60.7)				<0.001	S
				Divalproex sodium	66.3(62.1-70.4)	59.5(55.1-63.8)				0.02	S
				Isotretinoin	89.7(82.8-94.6)	95.3(90.5-98.1)				0.83	NS
				Lithium	53.3(47.6-59.2)	43.0(37.1-49.1)				0.02	S
				Metformin	82.9(81.1-84.5)	75.8(73.7-77.8)				<0.001	S
				Methotrexate	90.7(86.5-94.0)	88.6(84.0-92.3)				0.43	NS
				Nefazodone hydrochloride	58.1(47.4-68.2)	48.2(38.7-57.9)				0.16	NS
				Pioglitazone hydrochloride	93.1(87.4-96.8)	89.6(82.5-94.5)				0.32	NS
				Statin+gemfibrozin	90.5(86.8-93.4)	83.5(79.1-87.2)				0.01	S
				Percentage of laboratory monitoring prescriptions	79.1%	70.2%			68.9-71.5	<0.001	S
24	McCowan	2001	Medical Informatics	proportion of patients initiated asthma consultation with general practioner	0.34	0.22		0.59	0.37-0.95		S
				patients reporting as suffering an acute exacerbation of asthma	0.08	0.17		0.43	0.21-0.85		S
25	McMullin	2004	Annals of Family Medicine	Mean cost per new prescription			4.16$		$0.84-$7.49	0.02	S
				Mean cost per new and refilled prescription			4.99$		$1.49-$8.48	0.01	S
				Total cost for high-cost drug categories			4.43$		$0.18-$9.04	0.06	S
26	Medow	2001	Medical Decision Making	Terapeutic accuracy	8.40%	0.30%	-8.10%			0.32	NS
				Severity classificaion	-0.11	0.1	-0.22			0.28	NS
				Subtype classification	-0.06	-0.15	0.09			0.39	NS
				Therapeutic target	0.05	0.09	-0.04			0.66	NS
				Antipsychotic use	-0.01	0.07	-0.08			0.28	NS
27	Meigs	2003	Diabetes Care	Number of glycated haemoglobin tests (tests/year)	+0.3	-0.04				0.008	S
				Number of LDL cholesterol tests (tests/year)	+0.2	0.01				0.02	S
				Proportion of patients undergoing at least 1 foot examination/year	+9.8%	-0.7%				0.003	S
				Level of glycated haemoglobin	-0.20%	0.01%				0.09	NS
				Proportion of patients with LDL cholesterol level <130mg/dl	+23.0%	+10.5%				0.5	NS
28	Montgomery	2000	BMJ	Risk of cardiovascular events				1.7	0.7 - 0.39	0.22	NS
29	Mosen	2004	Chest	Increase in overall prophylaxis rate	95.0%	89.9%				<0.0001	S
				Increase in prophylaxis rate for general surgery	98.7%	94.0%				<0.0001	S
				Increase in prophylaxis rate for orthopedics surgery	89.9%	90.4%				<0.0001
				Increase in prophylaxis rate for gynecology surgery	99.5%	85.1%				<0.0001	S
				Increase in prophylaxis rate for urology surgery	78.7%	84.1%				<0.0001
				Venous Thromboembolism (VTE) + mortality rate caused by VTE				1.21	0.67-2.20		NS
30	Murtaugh	2005	Health Services Research	percentage of nurses recording assessment items						0.001	S
				percentage of nurses instructing patients about sign and symponts of Heart Failure						>0.05	NS
				percentage of nurses recording other HF management instructions						0.001	S
31	Overhage	1996	Archives of Internal Medicine	Overall compliance	0.23	0.24				0.78	NS
32	Overhage	1997	JAMIA	Immediate compliance	46.4%	27.6%				<0.0001	S
				24h compliance	50.9%	35.3%				<0.0001	S
				Hospital-stay compliance	56.0%	43.5%				<0.0001	S
				Mean immediate compliance	48.0%	23.0%				<0.001	S
				Average lenght of stay(days)	7.62	8.12	-0.50		-0.17; 1.19	0.94	NS
				Average hospital charges	$8,073.52	$8,589.47	-515.95$		$-828.41; $1,316.85	0.68	NS
33	Poller			Dosing of anticoagulant						0.57	NS
				Results obtained from patient with assigned range (3.0 - 4.5)						0.044	S
				Results obtained from patient with assigned range (2.0 - 3.0)						0.63	NS
34	Rood	2005	JAMIA	Compliance with glucose measurement timing recommendations	40.18%	35.54%	4.6		2-7.4		S
				Compliance with insulin dose advice	77.3%	64.2%	13.1		11-16		S
35	Rossi	1996	Journal of General Internal Medicine	Prescription changes	(39)11.3%	(1)<1.0%				0.0001	S
36	Safran	1995	The Lancet	alerts - median response time (days)
				Time taken for a CD4 count (132/189)	24	70				<0.0001	S
				Begin Zidovudine (AZT) or Didanosine (DDI) (14/20)	7	43				0.112	NS
				Complete blood count (121/138)	8	32				<0.0001	S
				Change AZT dose (17/19)	14	47				0.144	NS
				PCP prophylaxis (19/22)	11	122				<0.0001	S
				All alerts (303/388)	11	52				<0.0001	S
				Reminders - median response time (days)
				Toxoplasmosis titre (53/39)	8	168				0.024	S
				Tuberculin skin test (53/41)	39	134				0.068	NS
				Pneumovax (54/50)	63	>500				0.0005	S
				H influenza vaccine (69/50)	>500	>500				0.04	S
				Ophthamologic referral (108/85)	143	>500				0.0007	S
				Tetanus shot (68/52)	>500	>500				0.097	NS
				Pap test (29/34)	112	132				0.975	NS
				All reminders (432/360)	114	>500				<0.0001	S
				Rate of visits to the primary care physician or nurse pactitioner						0.29	NS
				Rate of visits outside the primary care practice						0.02	S
				Admission rate						0.47	NS
				Visits to the emergency ward						0.24	NS
				Discharges with a diagnosis of pneumocystosis						0.09	NS
				Survival rate						0.19	NS
37	Schriger	1997	Journal of the American Medical Association	Level of documentation in medical records	98%(97-100)	57%(49-65)	0.42		34-49		S
				Level of documentation after instructions	0.93	0.31			Int 89%-97% Contr 24%-38%		S
				Compliance with guidelines regarding tests	0.83	0.63			Int 79%-87% Contr 53%-73%		S
				Compliance with guidelines regarding treatments	0.96	0.83			Int 94%-97% Contr 79%-87%		S
				Average total per-patient charges	384$	469$			Int 354-412 Contr 393-527		NS
				Mean charges for the activities indicated in the guidelines	0.81	0.44	0.37		22-52		NS
38	Sequist	2005	JAMIA	Diabetes- compliance to guidelines				1.30	1.01-1.67		S
				Coronary artery disease-compliance to guidelines				1.25	1.01-1.55		S
				Diabetes-annual cholesterol examination				1.41	1.15-1.72	<0.001	S
				Biennal haemoglobin A1c examination				1.14	0.89-1.46	0.29	NS
				Annual dilated eye examination				1.38	0.81-2.32	0.23	NS
				Hypertension/ACEinibitor use				1.42	0.94-2.14	0.1	NS
				Statin use for LDL cholesterol >130 mg/Dl				1.10	0.65-1.85	0.73	NS
				Coronary artery disease-annual cholesterol examination				0.99	0.75-1.29	0.92	NS
				Aspirin use				2.36	1.37-4.07	0.002	S
				B-blocker use				1.09	0.72 -1.63	0.69	NS
				Statin use for LDL cholesterol >130 mg/Dl				1.51	1.05.2.17	0.03	S
39	Shojania	1998	JAMIA	Vancomycin orders/physicians	11.3	16.7	-32%			0.04	S
				Patients initiated or renewed an order for vancomycin/physicians	7.4	10.3	-28%			0.02	S
				duration of vancomycin therapy	26.5	41.2				0.05	S
40	Steele	2005	American Journal of Preventive Medicine	Appropriate adherence with (Centers for Desease Control) CDC Latent Tuberculosis Infection (LTBI) screening guidelines	25.2%	8.9%				<0.001	S
41	Thomas	1999	Journal of Medical Internet Research	Accuracy in answers on asthma	91.6%(88.0-95.3)	83.6%(80.5-86.7)				0.001	S
				Severity assessment on asthma						0.032	S
				Diagnostic/ therapeutic responses to asthma						<0.005	S
				Accuracy in answers on tuberculosis	95.8%	56.6%				<0.001	S
42	Tierney	2003	Journal of General Internal Medicine	Suggestions complied with all cardiac care suggestions	23(PI;FI;BoI)	22				>0.2	NS
				Patient medication compliance						>0.69	NS
				Medication possession ratio						>0.10	NS
				Satisfaction with physicians						>0.5	NS
				Satisfaction with pharmacists						>0.4	NS
				Number of emergency departement visits(heart disease specific)	0.2±0.4(Physicians PH);0.2±0.6(Pharmacists PHA);0.1±0.4(Both)	0.2±0.5				>0.5	NS
				Number of hospitalizations(heart disease specific)	0.2±0.6(PH);0.2±0.7(PHA);0.2±0.6(Both)	0.2±0.5				>0.5	NS
				Direct health care charges						>0.5	NS
				Outpatient charges	2961±2795(PH);3143±3124(PHA);3176±2974(Both)	2696±3363				>0.5	NS
				Inpatient charges	3341±9162(PH);4245±11544(PHA);4463±15217(Both)	4330±14461				>0.5	NS
				Total health care charges	6302±10928(PH);7387±13206(PHA);7639±16921(Both)	7025±17024				>0.5	NS
43	Turner	1994	Archives of Internal Medicine	Variation in the performance of influenza vaccination						0.51	NS
				Variation in the performance of stool examination for occult blood						0.7	NS
				Variation in the performance of pap smear						0.1	NS
				Variation in the performance of physician-performed breast examination						0.64	NS
				Variation in the performance of mammogram						0.41	NS
44	Williams	1998	Archives of Family Medicine	Completation of screening mammography			8.8%			<0.05	S
				Completation of clinical breast examination			8.3%			<0.05	S
				Completation of digital rectal examination			2.1%			>0.5	NS
				Completation of fecal occult blood test			1.0%			>0.5	NS
				Completation of flexible sigmoidoscopy			1.3%			>0.5	NS
				Completation of papanicolaou smear			2.7%			>0.5	NS
				Completation of oral cavity examination			2.4%			>0.5	NS
				Completation of screening mammography*			13.0%			<0.01	S
				Completation of clinical breast examination*			24.0%			<0.01	S
				Completation of digital rectal examination*	*=user vs nonuser touch-sensitive computer system		16.0%			<0.01	S
				Completation of fecal occult blood test*			14.1%			<0.01	S
				Completation of flexible sigmoidoscopy*			5.7%			>0.5	NS
				Completation of papanicolaou smear*			5.2%			>0.5	NS
				Completation of oral cavity examination*			7.2%			>0.5	NS
45	Zanetti	2003	Infection control and hospital epidemiology	Percentage of patients who received intraoperative redosing	0.68	0.4		1899-12-31 03:31:00	1.97-5.56	<0.001	S
				Occurence of surgical-site infection	0.04	0.06				0.4	NS
Acronyms and abbreviations
ID= Identification Number
S= Significant
NS= Not Significant
BI= Basic Intervention
AI= Augmented Intervention
HR= Hazard Ratio
OR= Odds Ratio
PH = Physician Intervention
PHA = Pharmacist Intervention
